# Supplementary material for: Nitrogen-vacancy-rich molybdenum nitride nanosheets as highly efficient electrocatalysts for nitrogen reduction reaction
Source: Royal Society of Chemistry journal article supplement (doi:10.1039/d3dt02761a), 2023-12-19
Supplement: d3dt02761a1.pdf [file d3dt02761a1.pdf]

## Supporting information

### **Nitrogen Vacancy Rich Molybdenum Nitride Nanosheets as Highly Efficient Electrocatalysts for Nitrogen Reduction Reaction**

Muhammad Adnan Younis,<sup>a, b</sup> Saira Manzoor,<sup>\*a, b</sup> Amjad Ali,<sup>\*, c, d</sup> Li Guo,<sup>\* c</sup> Muhammad Imran  
Yousaf,<sup>e</sup> Sofia Nosheen,<sup>f</sup> Ahmad Naveed,<sup>c</sup> Naushad Ahmad<sup>g</sup>

<sup>a</sup> Institute of Microscale Optoelectronics, Shenzhen University, Shenzhen, 518060, China

<sup>b</sup> ZJU-Hangzhou Global Scientific and Technological Innovation Center, Hangzhou 311215, China

<sup>c</sup> Research School of Polymeric Materials, School of Materials Science and Engineering, Jiangsu University, Zhenjiang, 212013, China

<sup>d</sup> Institute of Chemistry, University of Silesia, Szkolna 9, Katowice 40-600, Poland

<sup>e</sup> Department of Applied Sciences, National Textile University, Faisalabad, Pakistan

<sup>f</sup> Department of environmental science, Lahore College for Women University, Pakistan

<sup>g</sup> Department of Chemistry, College of Science, King Saud University, Riyadh-11451, Kingdom of Saudi Arabia.

\*Corresponding author: E-mail address

[Saira@bit.edu.cn](mailto:Saira@bit.edu.cn) (Dr. Saira Manzoor), [Amjadali@zju.edu.cn](mailto:Amjadali@zju.edu.cn) (Associate Prof. Dr. Amjad Ali),

[liguo@ujs.edu.cn](mailto:liguo@ujs.edu.cn) (Professor. Li Guo),

**Table S1:** Comparison of the NRR performance of MoN-NV<sub>2</sub> with other recently reported electrocatalysts.

| Catalyst                            | Electrolyte                           | NH <sub>3</sub> Yield<br>( $\mu\text{g h}^{-1} \text{mg}^{-1} \text{cat}$ ) | FE (%) | Ref.      |
|-------------------------------------|---------------------------------------|-----------------------------------------------------------------------------|--------|-----------|
| Mo nanofilm                         | 0.1 M H <sub>2</sub> SO <sub>4</sub>  | 3.09                                                                        | 0.72   | 1         |
| MoN nanosheets                      | 0.1 M HCl                             | 3.3                                                                         | 1.15   | 2         |
| MoN                                 | 0.1 M HCl                             | 3.0                                                                         | 1.2    | 3         |
| VN                                  | 0.1 M HCl                             | 8.4                                                                         | 2.3    | 4         |
| W <sub>2</sub> N <sub>3</sub>       | 0.1 M KOH                             | 11.7                                                                        | 11.7   | 5         |
| Mo <sub>2</sub> C/C                 | 0.1 M Li <sub>2</sub> SO <sub>4</sub> | 11.3                                                                        | 7.8    | 6         |
| MoO <sub>3</sub>                    | 0.1 M HCl                             | 29.43                                                                       | 1.9    | 7         |
| N-doped carbon                      | 0.05 M H <sub>2</sub> SO <sub>4</sub> | 11.76                                                                       | 1.42   | 8         |
| Fe <sub>2</sub> O <sub>3</sub> -CNT | 2.0 M NaHCO <sub>3</sub>              | 0.22                                                                        | 0.15   | 9         |
| MoS <sub>2</sub>                    | 0.1 Na <sub>2</sub> SO <sub>4</sub>   | 8.08                                                                        | 1.17   | 10        |
| MoN-NV <sub>2</sub>                 | 0.1 M KOH                             | 22.5                                                                        | 14     | This work |

## References

1. Yang, D.; Chen, T.; Wang, Z., Electrochemical reduction of aqueous nitrogen (N<sub>2</sub>) at a low overpotential on (110)-oriented Mo nanofilm. *J. Mater. Chem. A*. 2017, 5 (36), 18967-18971.
2. Zhang, L.; Ji, X.; Ren, X.; Luo, Y.; Shi, X.; Asiri, A. M.; Zheng, B.; Sun, X., Efficient electrochemical N<sub>2</sub> reduction to NH<sub>3</sub> on MoN nanosheets array under ambient conditions. *ACS Sustain. Chem. Eng.* 2018, 6 (8), 9550-9554.
3. Li, Q.; He, L.; Sun, C.; Zhang, X., Computational study of MoN<sub>2</sub> monolayer as electrochemical catalysts for nitrogen reduction. *J. Phy. Chem. C*. 2017, 121 (49), 27563-27568.

4. Zhang, R.; Zhang, Y.; Ren, X.; Cui, G.; Asiri, A. M.; Zheng, B.; Sun, X., High-efficiency electrosynthesis of ammonia with high selectivity under ambient conditions enabled by VN nanosheet array. *ACS Sustain. Chem. Eng.* 2018, 6 (8), 9545-9549
5. Jin, H.; Li, L.; Liu, X.; Tang, C.; Xu, W.; Chen, S.; Song, L.; Zheng, Y.; Qiao, S.-Z., Nitrogen vacancies on 2D layered W<sub>2</sub>N<sub>3</sub>: A Stable and efficient active site for nitrogen reduction reaction. *Adv. Mater.* 2019, 31 (32), 1902709.
6. Cheng, H.; Ding, L. X.; Chen, G. F.; Zhang, L.; Xue, J.; Wang, H., Molybdenum carbide nanodots enable efficient electrocatalytic nitrogen fixation under ambient conditions. *Adv. Mater.* 2018, 30 (46), 1803694.
7. Han, J.; Ji, X.; Ren, X.; Cui, G.; Li, L.; Xie, F.; Wang, H.; Li, B.; Sun, X., MoO<sub>3</sub> nanosheets for efficient electrocatalytic N<sub>2</sub> fixation to NH<sub>3</sub>. *J. Mater. Chem. A.* 2018, 6 (27), 12974-12977.
8. Liu Y, Su Y, Quan X, Fan X, Chen S, Yu H, Zhao H, Zhang Y, Zhao J. Facile ammonia synthesis from electrocatalytic N<sub>2</sub> reduction under ambient conditions on N-doped porous carbon. *ACS Catal.* 2018, 8(2), 1186-91.
9. Chen S, Perathoner S, Ampelli C, Mebrahtu C, Su D, Centi G. Electrocatalytic synthesis of ammonia at room temperature and atmospheric pressure from water and nitrogen on a carbon-nanotube-based electrocatalyst. *Angewandte Chemie International Edition.* 2017, 56(10), 2699-703.
10. Zhang, L., Ji, X., Ren, X., Ma, Y., Shi, X., Tian, Z., Asiri, A.M., Chen, L., Tang, B. and Sun, X. Electrochemical ammonia synthesis via nitrogen reduction reaction on a MoS<sub>2</sub> catalyst: theoretical and experimental studies. *Advanced Materials*, 2018, 30 (28), 1800191.
